# Supplementary material for: Time-Resolved Pharmacological Studies using Automated, On-line Monitoring of Five Parallel Suspension Cultures
Source: PubMed Central journal article supplement (PMC5583285; doi:10.1038/s41598-017-10472-1), 2017-09-04
Supplement: 41598_2017_10472_MOESM1_ESM.pdf [file 41598_2017_10472_MOESM1_ESM.pdf]

# Time-Resolved Pharmacological Studies using Automated, On-line Monitoring of Five Parallel Suspension Cultures

Ala A. Alhusban Michael C. Breadmore, Nuri Gueven, Rosanne M. Guijt

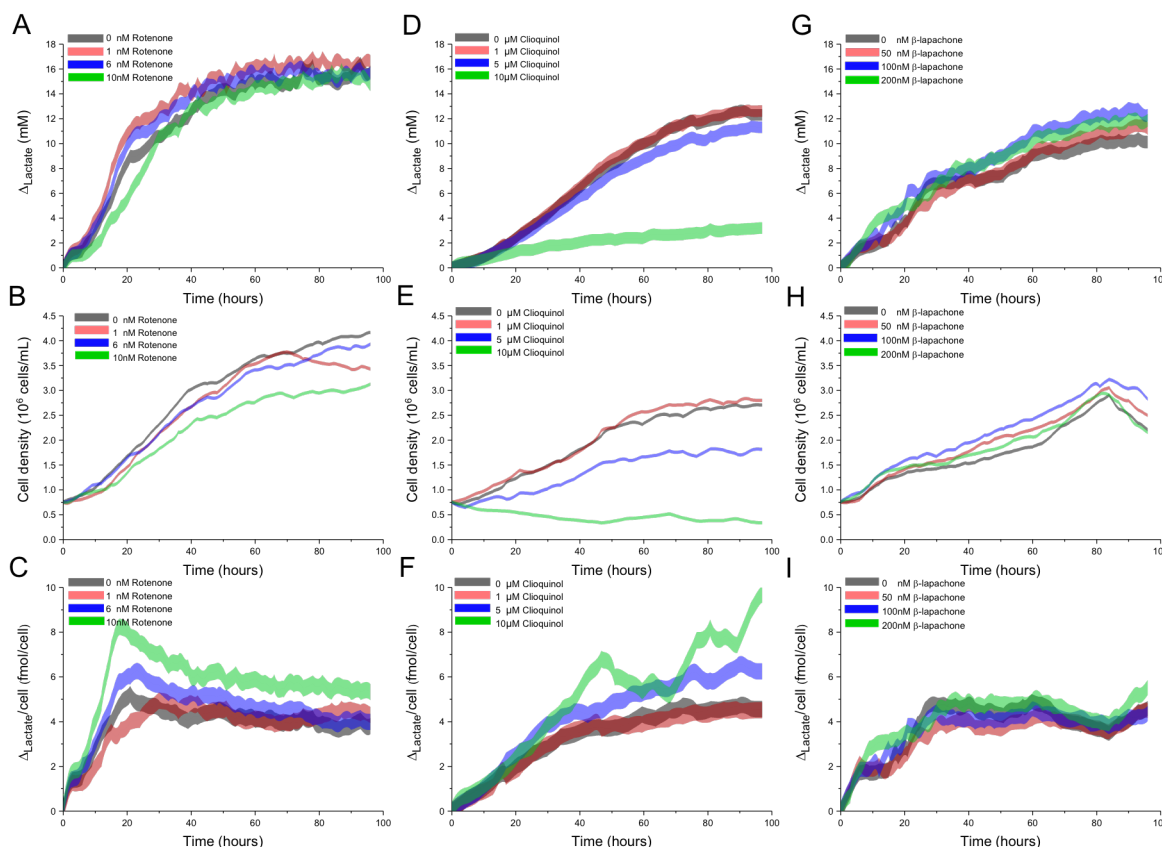

Figure SI-1 Monitoring of 5 parallel Jurkat cell cultures over 4 days in the absence or presence of **Rotenone** (A, B and C), **Cloiquinol** (D, E and F) and **β-lapachone** (G, H and I) (shown as lines with SD error-bar as colored bands).

1 nM, 6 nM, 10 nM of **rotenone** was added to individual cell cultures: Changes in lactate concentration (n=5), B: Changes in cell density (n=5), C: Changes in lactate concentrations standardized on cell density (n=5). Statistical significant differences, based on the rate of lactate production per cell per time, were obtained between 10 nM treatment and control ( $p < 0.001$ ) and 6 nM treatment and control ( $p = 0.046$ ), whereas no significant difference between 1 nM treatment and control ( $p = 0.413$ ).

1 μM, 5 μM, 10 μM of **cloiquinol** was added to individual cell cultures D: Changes in lactate levels over time (n=5), E: Changes in cell density (n=5), F: Changes in lactate concentrations standardized on cell density (n=5), statistical significant differences, based on the rate of lactate production per cell per time were obtained between 10 μM treatment and control ( $p < 0.001$ ) and 5 μM treatment and control whereas no significant difference was found between 1 μM and control.

50 nM, 100 nM, 200 nM of **β-lapachone** was added to individual cell cultures G: Changes in lactate levels over time (n=5), H: Changes in cell density (n=5), I: Changes in lactate concentrations standardized on cell density (n=5), no significant differences were found between treatments and control based on the rate of lactate production per cell per time, using one way ANOVA test.
